# Supplementary material
Source: Research Square preprint supplement (doi:10.21203/rs.3.rs-9142292/v1)
Supplement: Supplementary file 1 [file df347e9374106d54d0057f55.xlsx]

## Sheet: Sheet1
	Treg															Cytotoxic T															Melanocytic
	TF	Target	TR_Weight		TF	Target	TR_Weight		TF	TR_Weight		TF	TR_Weight			TF	Target	TR_Weight		TF	Target	TR_Weight		TF	TR_Weight		TF	TR_Weight				TF	Target	TR_Weight		TF	Target	TR_Weight		TF	TR_Weight		TF	TR_Weight
					<fctr>	<fctr>	<dbl>		<fctr>	<dbl>		<fctr>	<dbl>
129404	NME1	SDHD	27.8315	18210	IL21	LOC100128420	-29.9677	107	FOSL2	817.884	23	ZSCAN16	-1147.85		169981	ZNF683	VIM	29.0803	228025	BAD	CTSA	-31.4784	335	ZNF227	1227.2	401	GTF2A2	-1344.27			54274	NEUROD1	NNAT	27.7536	72531	ENO1	BNIP3	-28.8661	130	NEUROD1	608.34	57	ENO1	-1063.07
641458	MBD1	ZFP62	26.4894	228350	BHLHE40	S100A11	-28.4561	344	PQBP1	723.611	132	HMG20B	-991.696		10636	ETV1	KLRG1	26.1018	93135	EGR2	WDR83OS	-26.3068	376	MED30	967.85	367	RAN	-1130.8			211066	NEUROD1	ASS1	27.2903	244692	TFAP2C	AHR	-26.3017	158	RAN	512.912	158	RAN	-819.741
257217	HDAC8	OXA1L	26.2196	418012	FOSL2	SELK	-27.9948	92	IRF2	714.627	339	NME1	-927.667		139851	ZNF18	FBXL5	24.8848	17589	FOS	PPP1R15A	-26.1424	71	USF1	962.19	277	ZBTB17	-1011.96			66455	STAT1	UBE2L6	23.188	343175	ZNF644	TMEM251	-25.9133	45	DLX5	473.693	13	ATF4	-723.896
627671	ZNF324	PHF1	25.851	337917	FOSL2	TRADD	-27.6475	386	ZNF800	639.242	338	NCALD	-861.931		648762	STAT1	STAT2	24.8204	399966	JUN	HSPA1B	-25.3616	422	ZNF234	881.839	383	ZNF706	-1004.9			24107	NME1	RAD51C	21.5064	347386	ZNF32	ZNF574	-24.799	62	EZH2	471.571	151	PIR	-712.856
560615	IL21	HIF1A	24.9346	218242	ZBED2	UBA7	-26.908	298	TAF6	628.264	365	IL21	-830.192		438130	THAP1	C14orf2	23.4303	33740	JUNB	IER2	-24.2643	402	TRIM28	880.958	171	PINX1	-990.491			116596	NEUROD1	GTSF1	20.4704	172211	TAF9	YAE1D1	-23.6648	38	CTCFL	451.11	139	NONO	-706.07
117162	HMG20B	CCDC115	24.811	378241	ZNF140	NUDT22	-26.8019	266	ZNF581	623.247	69	RFXANK	-807.424		292048	RUNX2	TSTD1	22.6267	334577	ZNF134	SUCLG1	-23.7387	409	RLF	874.669	272	ZNF134	-952.353			221246	RAN	H2AFZ	20.1486	222119	STAT1	HLA-DPA1	-23.6424	137	NME1	449.031	75	GTF3A	-614.261
268612	FOSL2	CRIP1	24.5557	6564	NME1	GSTP1	-24.8024	203	ZNF3	587.447	6	RELA	-783.542		165727	BHLHE40	SNRPF	22.5027	343229	MBNL2	PRDX2	-23.0728	107	FOXN3	872.675	45	IRF3	-947.107			284908	HMGA1	CTCFL	19.5659	120159	CENPBD1	LINC00339	-23.1552	95	ILF2	410.221	164	RNF114	-568.988
596872	TIGD1	ZKSCAN8	22.2202	72548	NCALD	RPS4Y1	-24.7685	346	RAN	582.207	185	CERS2	-762.125		533520	YEATS4	SNRNP40	22.4147	600110	FOS	KLF6	-22.6855	201	ZNF302	866.123	415	ZNF700	-942.135			251068	HMGA1	DDAH2	19.1216	222878	IRF1	ICAM1	-22.9959	96	ILF3	410.012	39	CTNNB1	-564.1
320678	TAF6	CNOT7	22.1608	123992	GTF3C2	CCT4	-23.9441	15	YY1	575.819	355	TRMT1	-748.621		527169	E2F4	ADSL	22.1286	380981	HDAC8	ATP5I	-22.5849	118	ATF6	860.078	261	ZNF586	-930.036			305501	ILF2	SMC3	18.9387	173408	ZNF574	ZNF326	-22.8845	53	EGR2	409.826	137	NME1	-551.839
594230	IL21	POU2AF1	22.0913	618690	NMRAL1	NUCB1	-23.5682	318	DIDO1	565.001	316	PML	-715.825		628204	ZNF431	ZNF567	21.9148	24677	ZNF337	LAMTOR4	-22.4161	339	CHD1	837.194	349	ZNF830	-921.133			182194	BCLAF1	DNAJB1	18.8106	6866	IRF1	CXCL10	-22.5601	108	KLF4	404.08	182	SP100	-549.4
206179	NME1	SEPW1	22.0907	138989	GTF2A2	SYF2	-23.1241	140	SP3	560.922	301	DPF2	-704.161		580343	RELB	SREBF2	21.7358	381494	APEX1	MRPS34	-22.2066	359	LARP1	834.849	27	ZNF75A	-915.246			48244	BCLAF1	HSPA1A	18.7138	191836	GTF3C2	MIF4GD	-22.2183	125	MSC	403.199	122	MITF	-509.077
245879	ZNF331	MIR4461	22.0179	312680	CERS2	GNAS	-22.98	171	ZBTB32	554.619	404	ZNF226	-687.46		328473	ZNF581	RNF113A	21.687	406157	MBNL2	KRTCAP2	-22.0987	358	KDM5A	832.744	184	MBNL2	-896.29			260656	HMGA1	MDK	18.4348	115207	PIR	GALE	-22.0526	145	PARP1	398.552	273	ZNF706	-506.317
526090	SMC3	MTF2	21.947	77862	ZBTB17	BLVRA	-22.7677	403	ZNF397	551.929	407	APEX1	-685.686		358192	GTF2I	ATP1A1	21.4733	366732	ATF3	CHI3L2	-21.7838	59	ELK4	830.244	116	USF2	-891.396			59448	ZKSCAN3	RGS2	18.262	132074	IRF1	SOD2	-20.8484	94	ID2	397.632	59	ETV5	-477.93
202174	RFXANK	NDUFB11	21.6482	466405	RNF114	MRPS33	-22.5296	98	MTF2	543.083	293	ACAA1	-671.647		102967	ZNF134	CPSF3L	21.2196	222168	ASH2L	PSMC5	-21.5421	328	ZNF426	825.741	280	THAP11	-888.08			262679	NME1	NDUFB8	18.2471	41041	PIR	CRYL1	-20.7294	93	HTATIP2	389.373	179	SND1	-441.479
305878	ZSCAN16	MAGED2	21.1929	97242	HMG20B	CPSF3L	-21.6949	57	BPTF	529.142	361	ZNF706	-671.446		289525	ZNF79	OXA1L	19.7032	220809	CREM	NDUFB11	-21.4227	242	ZNF248	824.27	331	SIN3A	-880.034			334828	ID2	PHGDH	18.0935	3759	HTATIP2	C3orf37	-20.7239	279	ZNF830	380.138	95	ILF2	-441.303
410542	FOSL2	CD97	21.0342	456335	ZNF22	SIVA1	-21.5915	376	ZNF559	525.933	170	VPS72	-666.37		136792	ZNF18	HPS1	19.3536	508340	FOS	TSC22D3	-21.3408	364	PDLIM5	823.558	137	ZNF692	-874.204			340853	TFAP2A	SPON2	18.046	253244	ARNT2	FABP7	-20.4506	193	TBP	379.579	157	RAD21	-436.887
78591	KLF2	AQP3	20.8388	463875	EZH2	NT5C	-21.4838	377	ZNF92	525.748	114	ATF2	-657.368		616844	ZNF100	ZNF430	19.3455	584814	ZZZ3	CREBZF	-21.158	204	ZNF549	816.775	283	HIVEP2	-865.273			252461	GTF2B	EIF2B2	17.4686	101577	ENO1	USE1	-20.1721	244	ZNF32	378.567	159	RBBP5	-436.282
9645	BHLHE40	GLIPR2	20.5017	448059	GTF2B	SUSD3	-21.428	152	ZNF211	519.447	283	MBD1	-642.315		428974	ZBTB17	PWP1	19.2376	69572	ATF3	GMFG	-20.5689	394	ZSCAN2	816.063	199	ZNF671	-860.566			11739	SNAI2	GSTM1	17.4603	7389	ENO1	DDX41	-20.0619	35	CREB3L4	378.493	198	TFAP2C	-429.219
44744	NME1	GLRX3	20.3229	603189	ZNF302	TAF6	-21.1957	244	ZNF586	518.115	302	ZGPAT	-636.258		489491	TBX21	BIN1	19.0481	476691	NME1	NDUFB9	-20.5086	122	CREB3	786.207	273	ZNF260	-848.677			237292	NEUROD1	STMN1	17.3577	279783	CTNNB1	APOBEC3G	-20.0017	12	ATF3	376.368	8	ARNT2	-420.342
166132	HMG20B	HNRNPF	20.2625	326140	IL21	CHI3L2	-20.8296	228	ZNF44	517.077	46	IRF5	-634.293		26367	E2F4	MRPS21	18.8205	610234	ZNF140	XPA	-20.4072	187	ZEB1	783.072	374	TBPL1	-839.317			325754	DIDO1	HIST1H2BK	17.273	66012	CBFB	TUBB6	-19.7213	248	ZNF408	369.628	177	SNAI2	-411.685
	Th1															Exhausted T															Stress Melanoma
	TF	Target	TR_Weight		TF	Target	TR_Weight		TF	TR_Weight		TF	TR_Weight			TF	Target	TR_Weight		TF	Target	TR_Weight		TF	TR_Weight		TF	TR_Weight				TF	Target	TR_Weight		TF	Target	TR_Weight		TF	TR_Weight		TF	TR_Weight
	<fctr>	<fctr>	<dbl>
447467	MYC	DANCR	26.7669	641458	MBD1	ZFP62	-28.072	171	ZBTB32	873.937	46	IRF5	-2020.49		299333	ZNF683	LGALS3	31.0455	278562	CERS2	BUD31	-30.3622	185	ARGFX	1284.98	332	ZNF511	-1563.95			211066	NEUROD1	ASS1	27.2856	72531	ENO1	BNIP3	-28.9127	158	RAN	1235.3	158	RAN	-944.226
15045	FOS	PPP1R15A	25.3385	129404	NME1	SDHD	-27.9478	203	ZNF3	808.824	132	HMG20B	-1962.36		535894	RUNX2	PIK3IP1	30.126	228025	BAD	CTSA	-29.0199	70	POU5F1	1233.71	401	GTF2A2	-1460.9			230242	NEUROD1	PCBP4	26.7336	89658	ZNF652	NQO2	-24.5213	137	NME1	1043.52	122	MITF	-785.99
213039	FOXP3	ANXA1	22.4984	2413	NCALD	ALDOC	-27.1155	14	ZSCAN32	800.46	365	IL21	-1941.65		618446	JUNB	ZNF331	28.5182	499143	ATF3	DEDD2	-26.5532	30	CRX	1219.07	348	BAD	-1232.14			10901	STAT1	GBP2	25.4554	295969	PIR	MLANA	-24.3827	95	ILF2	809.466	57	ENO1	-763.135
535032	MYC	SATB1	21.6652	486304	NME1	NDUFS7	-27.0274	156	KLF2	786.955	23	ZSCAN16	-1859.04		392972	FOS	TBCC	25.6005	25834	TBX21	ADAM8	-25.5047	212	ZNF483	1154.74	71	USF1	-1197.65			126271	ZBED1	PEX11B	24.6695	347386	ZNF32	ZNF574	-24.2343	57	ENO1	805.932	151	PIR	-684.362
78591	KLF2	AQP3	21.4562	33246	IRF5	PIH1D1	-26.9658	192	ZNF671	780.895	339	NME1	-1757.93		99310	JUN	DNAJB1	24.8435	411712	ELF4	C12orf75	-25.2989	188	ZFP14	1141.1	270	ZNF121	-1190.08			28717	ZNF22	TAPBPL	21.9399	344047	ARNT	TSTD1	-23.306	139	NONO	798.768	139	NONO	-643.602
448059	GTF2B	SUSD3	21.428	15366	ZNF274	EXOC4	-26.7584	209	ZNF708	772.003	367	ZBED2	-1673.62		520993	ATF3	XCL2	24.7135	500575	ZNF3	POLR3GL	-25.0583	74	SHOX	1138.94	314	ACAA1	-1169.05			20998	NEUROD1	PAGE2B	21.5168	6866	IRF1	CXCL10	-22.4971	5	APEX1	689.995	177	SNAI2	-571.438
638904	ZNF33A	ZNF253	21.4207	82535	IL21	IDH3G	-26.3235	152	ZNF211	747.845	69	RFXANK	-1649.65		489154	NR4A2	PTGER4	24.5833	101556	ASH2L	RPA2	-24.7124	422	ZNF234	1086.1	414	ZNF689	-1164.66			24107	NME1	RAD51C	21.2955	124464	IRF7	NR1H2	-21.666	145	PARP1	671.939	102	IRF7	-553.535
588706	STAT1	STAT2	21.0832	542966	IRF8	E2F4	-26.1133	190	ZNF506	742.211	338	NCALD	-1636.42		396885	ATF3	ANKRD36BP1	23.3268	439080	ZNF511	MT2A	-24.6938	310	GATAD1	1081.12	202	ZNF184	-1159.3			178875	HMG20B	CCND1	20.9616	337111	METTL3	RAB38	-21.5732	62	EZH2	604.242	137	NME1	-527.092
375996	RELA	ATP5H	20.8752	257217	HDAC8	OXA1L	-26.0702	219	ZNF33A	736.205	170	VPS72	-1297.17		549871	CREBZF	HSF1	23.1194	478392	ACAA1	ATP5D	-23.4727	269	ZNF490	1079.27	45	IRF3	-1144.47			284908	HMGA1	CTCFL	20.4682	266072	PAX3	PLP1	-19.8712	45	DLX5	560.67	273	ZNF706	-501.383
462574	ZBTB16	TSC22D3	20.6224	342299	NME1	ZNHIT1	-25.7999	145	HSF2	730.867	290	ILF2	-1235.37		589330	STAT1	SP110	23.1158	685858	ZNF337	TRMT1	-23.3055	111	JUN	1068.34	350	ENO1	-1107.11			119895	DLX5	KRT8	20.3495	1843	PIR	ARPC1B	-19.5577	38	CTCFL	556.685	185	STAT1	-496.461
73368	ENO1	CALM2	20.4333	163011	HCLS1	DDIT4	-25.731	292	ZBTB25	719.064	150	BATF	-1225.54		524475	EOMES	SASH3	22.8454	595269	EOMES	HSF2	-23.0302	319	TFDP2	1058.1	286	ZNF581	-1083.67			253244	ARNT2	FABP7	20.2837	89867	TAF9	NT5C3	-19.5562	96	ILF3	547.42	164	RNF114	-468.173
404861	STAT1	PVRIG	20.3707	39270	THAP11	CDC26	-25.4474	408	CTBP1	716.229	185	CERS2	-1184.82		485598	JUNB	YPEL5	21.3373	438814	RFXANK	MT2A	-22.7185	259	ZSCAN22	1048.28	108	ZZZ3	-1062.88			116596	NEUROD1	GTSF1	20.1733	101577	ENO1	USE1	-19.5165	234	ZNF207	525.446	13	ATF4	-467.358
637719	ZBTB8A	ZNF471	20.3183	544430	IL21	IRF8	-25.0515	167	PINX1	714.859	65	ETV7	-1177.51		559098	ZBTB32	ELF4	20.9343	222168	ASH2L	PSMC5	-22.6924	159	ZNF665	1048.03	426	ZNF397	-1030.43			199532	RAN	RPA2	19.7526	98582	RNF114	TDRD3	-19.3951	130	NEUROD1	497.235	144	NUCB1	-444.528
598417	ZFP62	MBD1	20.0317	55241	IRF5	PDHB	-24.9333	81	TGIF2	709.998	330	GTF3C5	-1144.95		668284	JUN	CHD2	20.4901	334577	ZNF134	SUCLG1	-22.6286	386	DMC1	1034.51	162	YBX1	-1021.38			4697	STAT1	CD74	19.5504	253944	NUCB1	FSTL1	-19.3491	163	RFXANK	482.184	157	RAD21	-438.157
443325	FOS	PTGER4	19.9422	47416	FOSB	FOS	-24.9125	97	MYC	709.862	320	EZH2	-1138.02		72817	DDIT3	TUBA1A	20.4404	428974	ZBTB17	PWP1	-22.3782	222	ZNF529	1014.06	118	ATF6	-1014.53			182542	HMGA1	DRAP1	19.5063	325754	DIDO1	HIST1H2BK	-19.3159	81	HDAC2	463.51	269	ZNF689	-430.506
443732	MYC	BCL2A1	19.6624	267306	IRF5	RHOG	-24.7574	242	ZFP64	704.614	390	ZSCAN25	-1059.78		481685	JUN	GLTSCR2	20.4076	430157	HSF2	TMEM243	-21.611	421	ZNF43	1014.05	143	SP3	-1001.26			251068	HMGA1	DDAH2	19.3311	115207	PIR	GALE	-19.2985	191	TAF9	462.183	146	PAX3	-427.503
481461	ELK3	GGNBP2	19.3991	618690	NMRAL1	NUCB1	-24.7103	65	ETV7	703.409	54	BCL6	-1046.28		72651	FOS	TUBA1A	20.4015	220809	CREM	NDUFB11	-21.5572	364	PDLIM5	1003.77	278	ZNF335	-994.454			93736	MAFF	RAMP1	19.2455	189543	CTNNB1	KIT	-19.2062	46	DNMT1	458.702	140	NR1H2	-422.153
170630	ETV7	IL7R	19.3683	509155	IL21	BCL6	-24.5021	271	CDC5L	701.885	274	GTF2B	-1045.19		508340	FOS	TSC22D3	20.2332	415954	RAN	SNRPC	-21.4968	158	ZNF160	980.263	147	E2F4	-986.749			62312	ZNF7	SNRNP35	19.1512	345043	RAD21	UQCRFS1	-19.0287	181	SOX4	419.665	100	IRF3	-418.269
209734	EZH1	APRT	19.3423	72548	NCALD	RPS4Y1	-24.4828	198	ZNF317	699.063	355	TRMT1	-1025.58		192827	FOSB	JUN	19.331	102967	ZNF134	CPSF3L	-21.2781	394	ZSCAN2	975.402	430	APEX1	-981.509			34677	ZNF706	ZNF7	18.9738	321637	RAD21	ECI2	-19.0105	94	ID2	410.457	225	ZEB2	-411.436
214652	MYC	NOSIP	19.0032	93895	FOS	DNAJB1	-24.4401	35	ZNF384	698.91	146	IRF8	-1015.31		661850	ZNF766	PHF20	18.9897	265711	YY1	NSA2	-21.2466	274	ZNF350	974.685	199	ZNF671	-974.244			274112	ARNT2	TPD52L1	18.8305	38534	SP100	C3orf14	-18.8441	88	HMGA1	407.337	198	TFAP2C	-384.113
	Tfh																														Proliferate Melanoma
	TF	Target	TR_Weight		TF	Target	TR_Weight		TF	TR_Weight		TF	TR_Weight																			TF	Target	TR_Weight		TF	Target	TR_Weight		TF	TR_Weight		TF	TR_Weight
352064	FOXP3	IL2RA	30.7846	298141	ZBTB32	HTATIP2	-28.6626	23	ZSCAN16	1350.51	100	BHLHE40	-1314.61
555320	TCF7	ZBTB20	29.6534	228350	BHLHE40	S100A11	-28.4561	339	NME1	905.248	107	FOSL2	-1216.96																		72531	ENO1	BNIP3	30.3932	230242	NEUROD1	PCBP4	-26.9008	57	ENO1	834.412	158	RAN	-1098.97
47416	FOSB	FOS	27.8863	296454	FOXP3	CCR8	-28.2775	132	HMG20B	867.367	171	ZBTB32	-1195.51																		241577	STAT1	WARS	29.1783	83524	EGR1	IER2	-26.3266	151	PIR	732.23	57	ENO1	-928.035
641458	MBD1	ZFP62	27.7857	196946	STAT1	GBP1	-28.0265	6	RELA	826.023	65	ETV7	-1152.41																		185844	ARID5B	GPX3	27.2409	43767	ENO1	ENO2	-26.2603	158	RAN	693.653	139	NONO	-856.898
129404	NME1	SDHD	27.2699	524166	PRDM1	RORA	-27.6755	50	TCF7	804.284	328	ENO1	-1012.75																		295969	PIR	MLANA	26.4978	206381	ZNF280D	UCN2	-25.8403	122	MITF	633.472	95	ILF2	-855.093
560615	IL21	HIF1A	26.9489	46	IRF5	PDCL3	-26.9774	114	ATF2	785.555	21	PRDM1	-1010.24																		222119	STAT1	HLA-DPA1	25.9606	31160	NR1H2	TTC9C	-24.7087	139	NONO	632.213	137	NME1	-831.861
222490	TCF7	CCDC109B	25.6056	244938	JUNB	CXCR4	-26.8173	279	ZBTB8A	785.221	367	ZBED2	-1006.17																		89658	ZNF652	NQO2	25.0052	4697	STAT1	CD74	-24.4652	177	SNAI2	586.673	145	PARP1	-704.668
507195	ETV7	TCF7	25.3821	30400	FOS	IER2	-25.965	295	DRAP1	778.347	119	CREB3	-860.718																		306297	DLX5	SSR2	24.9581	172211	TAF9	YAE1D1	-24.4184	146	PAX3	584.524	5	APEX1	-681.13
542966	IRF8	E2F4	25.2829	383896	PRDM1	CAPN2	-25.8635	141	ZKSCAN3	745.163	80	TGIF1	-851.491																		161850	ZNF652	PLEKHJ1	23.8548	66455	STAT1	UBE2L6	-23.6391	137	NME1	505.707	96	ILF3	-612.99
39270	THAP11	CDC26	25.2288	163011	HCLS1	DDIT4	-25.2734	69	RFXANK	740.087	164	NR4A3	-810.62																		173408	ZNF574	ZNF326	23.6654	191836	GTF3C2	MIF4GD	-23.5007	75	GTF3A	492.294	45	DLX5	-563.987
430914	FOXP3	CD40LG	25.0139	337917	FOSL2	TRADD	-25.2371	278	ZBED5	735.952	26	ARNT	-803.718																		344047	ARNT	TSTD1	21.9098	272892	TFAP2C	TF	-23.3978	273	ZNF706	477.505	234	ZNF207	-553.069
169246	NUCB1	GDI2	23.8928	268612	FOSL2	CRIP1	-24.5557	146	IRF8	717.051	332	HDAC8	-790.179																		6866	IRF1	CXCL10	21.8749	126271	ZBED1	PEX11B	-23.2681	13	ATF4	466.348	38	CTCFL	-533.648
379466	KLF2	ICAM2	23.8553	453268	JUNB	IMP3	-24.1014	330	GTF3C5	711.042	334	HTATIP2	-788.284																		101577	ENO1	USE1	21.8159	342892	ZNF622	TMEM126A	-23.2018	129	MYC	466.062	164	RNF114	-490.216
618690	NMRAL1	NUCB1	23.8331	263990	TCF7	LGALS3	-23.9067	104	ZZZ3	705.719	261	NFYC	-760.4																		334828	ID2	PHGDH	20.9313	120159	CENPBD1	LINC00339	-23.0654	102	IRF7	418.577	88	HMGA1	-487.998
375996	RELA	ATP5H	22.9236	118778	JUNB	BTG2	-23.8483	264	ZBTB16	683.372	144	FOXP3	-742.167																		115207	PIR	GALE	20.8577	282551	ZNF689	CAPG	-21.9035	269	ZNF689	413.545	163	RFXANK	-485.189
386629	ZBTB16	TNFSF8	22.6892	537117	FOSL2	RUNX3	-23.5771	111	SREBF2	683.234	352	TBPL1	-733.084																		124464	IRF7	NR1H2	20.6336	20998	NEUROD1	PAGE2B	-21.8644	5	APEX1	410.389	70	GTF2A2	-480.479
386415	TCF7	TNFSF8	22.677	530918	ZNF692	USF2	-23.166	193	ZNF264	680.339	180	ZEB1	-717.841																		50078	RNF114	KLHDC8B	20.4465	3759	HTATIP2	C3orf37	-21.0648	29	CERS4	402.516	81	HDAC2	-478.699
606585	GTF2I	HCFC1	22.5546	424883	NCALD	CD320	-22.8623	341	NUCB1	677.97	203	ZNF3	-688.19																		7389	ENO1	DDX41	20.3343	284908	HMGA1	CTCFL	-20.8861	185	STAT1	398.8	13	ATF4	-467.544
306659	IKZF4	COA3	22.3416	456335	ZNF22	SIVA1	-22.6286	71	TP53	667.291	335	ID2	-684.135																		223247	STAT1	IFI30	19.9403	205804	ZGPAT	TUBB2A	-20.8136	164	RNF114	391.219	203	TP53	-433.803
413232	HCFC1	EIF3F	22.2048	387710	BHLHE40	ID2	-22.4864	275	TOPORS	661.765	37	PBX4	-680.846																		41041	PIR	CRYL1	19.796	116596	NEUROD1	GTSF1	-20.8029	8	ARNT2	380.921	130	NEUROD1	-432.499
																															253244	ARNT2	FABP7	19.6291	274112	ARNT2	TPD52L1	-20.7323	180	SOX10	379.517	179	SND1	-430.994
	CD4 Effector Memory																														Invasive Melanoma
	TF	Target	TR_Weight		TF	Target	TR_Weight		TF	TR_Weight		TF	TR_Weight																			TF	Target	TR_Weight		TF	Target	TR_Weight		TF	TR_Weight		TF	TR_Weight
352064	FOXP3	IL2RA	30.3154	555320	TCF7	ZBTB20	-30.7115	171	ZBTB32	1391.76	46	IRF5	-2692.58
303430	ETV7	HLA-DRB1	29.4399	509368	NR4A1	EGR2	-30.3715	65	ETV7	1098.86	23	ZSCAN16	-2544.88																		72531	ENO1	BNIP3	29.2497	244692	TFAP2C	AHR	-27.5381	130	NEUROD1	433.179	59	ETV5	-568.598
298141	ZBTB32	HTATIP2	28.6612	41565	ETV7	OASL	-29.8184	215	ZNF383	869.05	65	ETV7	-2340.16																		54274	NEUROD1	NNAT	28.2957	10901	STAT1	GBP2	-27.0297	62	EZH2	351.108	151	PIR	-563.004
196946	STAT1	GBP1	27.9869	18210	IL21	LOC100128420	-29.2627	204	ZNF562	817.359	339	NME1	-2149.1																		256805	STAT1	HLA-DRA	24.8897	166014	TFAP2C	SFRP1	-25.2208	158	RAN	327.186	57	ENO1	-548.125
296454	FOXP3	CCR8	27.9672	379466	KLF2	ICAM2	-27.8806	88	JUNB	814.597	365	IL21	-2120.61																		45587	STAT1	GBP1	23.9668	36335	ZNF280D	APOC2	-23.7719	45	DLX5	316.866	164	RNF114	-529.058
554603	NR4A1	KLF10	26.978	641458	MBD1	ZFP62	-27.6109	166	PPARD	780.919	338	NCALD	-1971.61																		66455	STAT1	UBE2L6	23.6585	222878	IRF1	ICAM1	-23.283	38	CTCFL	303.59	122	MITF	-488.18
635924	FOXP3	IKZF4	26.5664	486304	NME1	NDUFS7	-27.2424	17	ZSCAN26	773.445	132	HMG20B	-1961.47																		344047	ARNT	TSTD1	23.4392	63353	STAT1	TAP1	-22.7541	57	ENO1	289.031	198	TFAP2C	-468.301
309655	ETV7	HLA-DRB5	25.9643	2413	NCALD	ALDOC	-27.0763	19	ZNF32	755.469	150	BATF	-1954.02																		284908	HMGA1	CTCFL	21.8365	336610	SREBF2	PSMB8	-21.8912	127	MTF2	281.976	8	ARNT2	-448.823
6564	NME1	GSTP1	23.9754	33246	IRF5	PIH1D1	-26.7824	190	ZNF506	741.785	367	ZBED2	-1910.5																		116596	NEUROD1	GTSF1	20.8535	16644	ARID5B	MBNL2	-21.7069	46	DNMT1	280.447	146	PAX3	-437.351
553754	FOXP3	ZBTB32	23.3319	342299	NME1	ZNHIT1	-26.498	173	KLF10	714.952	185	CERS2	-1578.46																		80218	NEUROD1	GAGE6	20.758	115207	PIR	GALE	-21.3842	256	ZNF511	265.163	139	NONO	-430.386
359455	ETV7	CCR5	23.2232	378241	ZNF140	NUDT22	-25.9881	403	ZNF397	708.4	69	RFXANK	-1550.47																		178875	HMG20B	CCND1	20.4096	337111	METTL3	RAB38	-21.0779	102	IRF7	260.767	39	CTNNB1	-411.505
245879	ZNF331	MIR4461	23.057	257217	HDAC8	OXA1L	-25.6719	144	FOXP3	702.352	301	DPF2	-1306.33																		327823	NONO	IRF7	20.0309	11426	PAX3	GPR143	-20.9429	185	STAT1	254.812	185	STAT1	-411.486
277700	ETV7	SAT1	22.9493	39270	THAP11	CDC26	-25.6718	201	ZNF189	694.773	50	TCF7	-1254.82																		107312	PML	BCYRN1	19.1404	253244	ARNT2	FABP7	-20.5051	12	ATF3	249.159	158	RAN	-402.613
155275	ETV7	GBP2	22.2542	15366	ZNF274	EXOC4	-25.6582	400	ZNF493	686.023	330	GTF3C5	-1137.9																		305501	ILF2	SMC3	18.7451	195893	STAT1	PDLIM4	-20.2262	87	HMG20B	244.274	182	SP100	-364.913
405626	ZBTB32	SYNGR2	22.1613	386629	ZBTB16	TNFSF8	-25.548	375	ZNF672	677.686	352	TBPL1	-1083.39																		104330	ZNF7	ZNF706	18.3862	41041	PIR	CRYL1	-20.0754	101	IRF4	240.929	186	STAT2	-362.906
436230	ETV7	RHOC	22.1146	560615	IL21	HIF1A	-25.4813	263	ZBTB11	676.762	6	RELA	-1067.9																		285141	CTNNB1	CTSL1	18.2815	1843	PIR	ARPC1B	-19.9586	9	ASCC1	239.01	177	SNAI2	-353.601
2955	TCF7	SELL	21.8772	618690	NMRAL1	NUCB1	-25.4378	240	ZNF574	673.227	119	CREB3	-1058.86																		237292	NEUROD1	STMN1	18.2583	36437	ETV5	ARNT2	-19.8617	140	NR1H2	236.103	13	ATF4	-347.569
306659	IKZF4	COA3	21.843	154860	ETV7	TRIM27	-25.3109	126	TERF2	652.297	293	ACAA1	-1018.99																		323541	HMG20B	GAGE2D	17.4945	266072	PAX3	PLP1	-19.6517	162	RFX5	235.487	75	GTF3A	-334.013
448059	GTF2B	SUSD3	21.406	222490	TCF7	CCDC109B	-25.2267	289	GATAD1	651.641	320	EZH2	-982.305																		93464	MITF	QPCT	17.3112	304906	FOS	SGK1	-19.3732	79	HCFC1	231.96	103	IRF9	-330.312
594384	ZZZ3	CEBPZ	21.1626	267306	IRF5	RHOG	-24.8651	213	ZNF626	635.865	56	BACH1	-981.475																		309675	CTNNB1	TUBB4A	17.2305	184532	JUN	FOSB	-19.3456	53	EGR2	229.661	180	SOX10	-329.477
																															254212	NEUROD1	GAGE2A	16.7447	62894	ARNT2	SULT1A1	-19.2974	33	CREB3	229.497	144	NUCB1	-305.589
