# Supplementary material
Source: Research Square preprint supplement (doi:10.21203/rs.3.rs-9142292/v1)
Supplement: Supplementary file 2 [file f08f23e995c4f117314c77b7.xlsx]

## Sheet: Sheet1
	Treg															Cytotoxic T															Melanocytic
	TF	Target	TR_Weight		TF	Target	TR_Weight		TF	TR_Weight		TF	TR_Weight			TF	Target	TR_Weight		TF	Target	TR_Weight		TF	TR_Weight		TF	TR_Weight				TF	Target	TR_Weight		TF	Target	TR_Weight		TF	TR_Weight		TF	TR_Weight
					<fctr>	<fctr>	<dbl>		<fctr>	<dbl>		<fctr>	<dbl>
129404	NME1	SDHD	27.8315	18210	IL21	LOC100128420	-29.9677	107	FOSL2	817.884	23	ZSCAN16	-1147.85		169981	ZNF683	VIM	29.0803	228025	BAD	CTSA	-31.4784	335	ZNF227	1227.2	401	GTF2A2	-1344.27			66455	STAT1	UBE2L6	23.188	72531	ENO1	BNIP3	-28.8661	158	RAN	512.912	57	ENO1	-1063.07
641458	MBD1	ZFP62	26.4894	228350	BHLHE40	S100A11	-28.4561	92	IRF2	714.627	132	HMG20B	-991.696		10636	ETV1	KLRG1	26.1018	93135	EGR2	WDR83OS	-26.3068	376	MED30	967.85	367	RAN	-1130.8			24107	NME1	RAD51C	21.5064	244692	TFAP2C	AHR	-26.3017	45	DLX5	473.693	158	RAN	-819.741
257217	HDAC8	OXA1L	26.2196	418012	FOSL2	SELK	-27.9948	344	PQBP1	693.497	339	NME1	-927.667		139851	ZNF18	FBXL5	24.8848	399966	JUN	HSPA1B	-25.3616	71	USF1	962.19	277	ZBTB17	-1011.96			221246	RAN	H2AFZ	20.1486	343175	ZNF644	TMEM251	-25.9133	62	EZH2	471.571	13	ATF4	-723.896
627671	ZNF324	PHF1	25.851	337917	FOSL2	TRADD	-27.6475	386	ZNF800	639.242	338	NCALD	-861.931		648762	STAT1	STAT2	24.8204	33740	JUNB	IER2	-24.2643	422	ZNF234	881.839	383	ZNF706	-1004.9			284908	HMGA1	CTCFL	19.5659	347386	ZNF32	ZNF574	-24.799	38	CTCFL	451.11	151	PIR	-712.856
560615	IL21	HIF1A	24.9346	218242	ZBED2	UBA7	-26.908	298	TAF6	628.264	365	IL21	-830.192		438130	THAP1	C14orf2	23.4303	334577	ZNF134	SUCLG1	-23.7387	402	TRIM28	880.958	171	PINX1	-990.491			251068	HMGA1	DDAH2	19.1216	172211	TAF9	YAE1D1	-23.6648	137	NME1	449.031	139	NONO	-706.07
117162	HMG20B	CCDC115	24.811	378241	ZNF140	NUDT22	-26.8019	266	ZNF581	623.247	69	RFXANK	-807.424		292048	RUNX2	TSTD1	22.6267	343229	MBNL2	PRDX2	-23.0728	409	RLF	874.669	272	ZNF134	-952.353			305501	ILF2	SMC3	18.9387	222119	STAT1	HLA-DPA1	-23.6424	95	ILF2	410.221	75	GTF3A	-614.261
268612	FOSL2	CRIP1	24.5557	6564	NME1	GSTP1	-24.8024	203	ZNF3	587.447	6	RELA	-783.542		165727	BHLHE40	SNRPF	22.5027	380981	HDAC8	ATP5I	-22.5849	107	FOXN3	872.675	45	IRF3	-947.107			182194	BCLAF1	DNAJB1	18.8106	120159	CENPBD1	LINC00339	-23.1552	96	ILF3	410.012	164	RNF114	-568.988
596872	TIGD1	ZKSCAN8	22.2202	72548	NCALD	RPS4Y1	-24.7685	346	RAN	582.207	185	CERS2	-762.125		533520	YEATS4	SNRNP40	22.4147	17589	FOS	PPP1R15A	-22.4291	201	ZNF302	866.123	415	ZNF700	-942.135			48244	BCLAF1	HSPA1A	18.7138	222878	IRF1	ICAM1	-22.9959	125	MSC	403.199	39	CTNNB1	-564.1
320678	TAF6	CNOT7	22.1608	123992	GTF3C2	CCT4	-23.9441	15	YY1	575.819	355	TRMT1	-748.621		527169	E2F4	ADSL	22.1286	24677	ZNF337	LAMTOR4	-22.4161	118	ATF6	860.078	261	ZNF586	-930.036			260656	HMGA1	MDK	18.4348	173408	ZNF574	ZNF326	-22.8845	145	PARP1	398.552	137	NME1	-551.839
594230	IL21	POU2AF1	22.0913	618690	NMRAL1	NUCB1	-23.5682	318	DIDO1	565.001	316	PML	-715.825		628204	ZNF431	ZNF567	21.9148	381494	APEX1	MRPS34	-22.2066	339	CHD1	837.194	349	ZNF830	-921.133			59448	ZKSCAN3	RGS2	18.262	6866	IRF1	CXCL10	-22.5601	94	ID2	397.632	182	SP100	-549.4
206179	NME1	SEPW1	22.0907	138989	GTF2A2	SYF2	-23.1241	140	SP3	560.922	301	DPF2	-704.161		580343	RELB	SREBF2	21.7358	406157	MBNL2	KRTCAP2	-22.0987	359	LARP1	834.849	27	ZNF75A	-915.246			262679	NME1	NDUFB8	18.2471	191836	GTF3C2	MIF4GD	-22.2183	93	HTATIP2	389.373	122	MITF	-509.077
245879	ZNF331	MIR4461	22.0179	312680	CERS2	GNAS	-22.98	171	ZBTB32	554.619	404	ZNF226	-687.46		328473	ZNF581	RNF113A	21.687	366732	ATF3	CHI3L2	-21.7838	358	KDM5A	832.744	184	MBNL2	-896.29			334828	ID2	PHGDH	18.0935	115207	PIR	GALE	-22.0526	279	ZNF830	380.138	273	ZNF706	-506.317
526090	SMC3	MTF2	21.947	77862	ZBTB17	BLVRA	-22.7677	403	ZNF397	551.929	407	APEX1	-685.686		358192	GTF2I	ATP1A1	21.4733	222168	ASH2L	PSMC5	-21.5421	59	ELK4	830.244	116	USF2	-891.396			252461	GTF2B	EIF2B2	17.4686	132074	IRF1	SOD2	-20.8484	193	TBP	379.579	59	ETV5	-477.93
202174	RFXANK	NDUFB11	21.6482	466405	RNF114	MRPS33	-22.5296	98	MTF2	543.083	293	ACAA1	-671.647		102967	ZNF134	CPSF3L	21.2196	220809	CREM	NDUFB11	-21.4227	328	ZNF426	825.741	280	THAP11	-888.08			11739	SNAI2	GSTM1	17.4603	41041	PIR	CRYL1	-20.7294	244	ZNF32	378.567	179	SND1	-441.479
305878	ZSCAN16	MAGED2	21.1929	97242	HMG20B	CPSF3L	-21.6949	57	BPTF	529.142	361	ZNF706	-671.446		289525	ZNF79	OXA1L	19.7032	584814	ZZZ3	CREBZF	-21.158	242	ZNF248	824.27	331	SIN3A	-880.034			325754	DIDO1	HIST1H2BK	17.273	3759	HTATIP2	C3orf37	-20.7239	35	CREB3L4	378.493	95	ILF2	-441.303
410542	FOSL2	CD97	21.0342	456335	ZNF22	SIVA1	-21.5915	376	ZNF559	525.933	170	VPS72	-666.37		136792	ZNF18	HPS1	19.3536	69572	ATF3	GMFG	-20.5689	364	PDLIM5	823.558	137	ZNF692	-874.204			325714	ALX1	HIST1H2BK	17.261	253244	ARNT2	FABP7	-20.4506	248	ZNF408	369.628	157	RAD21	-436.887
9645	BHLHE40	GLIPR2	20.5017	463875	EZH2	NT5C	-21.4838	377	ZNF92	525.748	114	ATF2	-657.368		616844	ZNF100	ZNF430	19.3455	476691	NME1	NDUFB9	-20.5086	204	ZNF549	816.775	283	HIVEP2	-865.273			120578	RNF114	LOC550643	17.109	101577	ENO1	USE1	-20.1721	127	MTF2	367.819	159	RBBP5	-436.282
44744	NME1	GLRX3	20.3229	448059	GTF2B	SUSD3	-21.428	152	ZNF211	519.447	283	MBD1	-642.315		428974	ZBTB17	PWP1	19.2376	610234	ZNF140	XPA	-20.4072	394	ZSCAN2	816.063	199	ZNF671	-860.566			239141	APEX1	TMSB4X	16.3891	7389	ENO1	DDX41	-20.0619	5	APEX1	363.011	198	TFAP2C	-429.219
166132	HMG20B	HNRNPF	20.2625	603189	ZNF302	TAF6	-21.1957	244	ZNF586	518.115	302	ZGPAT	-636.258		489491	TBX21	BIN1	19.0481	399944	ATF3	HSPA1B	-20.3061	122	CREB3	786.207	273	ZNF260	-848.677			269090	EZH2	RRM2	16.3115	279783	CTNNB1	APOBEC3G	-20.0017	194	TBPL1	362.514	8	ARNT2	-420.342
262315	ZNF384	LINC00493	20.1392	326140	IL21	CHI3L2	-20.8296	228	ZNF44	517.077	46	IRF5	-634.293		26367	E2F4	MRPS21	18.8205	32350	ZNF274	ANKZF1	-20.1884	187	ZEB1	783.072	374	TBPL1	-839.317			227993	NME1	NDUFA12	16.3006	66012	CBFB	TUBB6	-19.7213	92	HSF2	361.681	177	SNAI2	-411.685
	Th1															Exhausted T															Stress Melanoma
	TF	Target	TR_Weight		TF	Target	TR_Weight		TF	TR_Weight		TF	TR_Weight			TF	Target	TR_Weight		TF	Target	TR_Weight		TF	TR_Weight		TF	TR_Weight				TF	Target	TR_Weight		TF	Target	TR_Weight		TF	TR_Weight		TF	TR_Weight
	<fctr>	<fctr>	<dbl>
447467	MYC	DANCR	26.7669	641458	MBD1	ZFP62	-28.072	171	ZBTB32	873.937	46	IRF5	-2020.49		299333	ZNF683	LGALS3	31.0455	278562	CERS2	BUD31	-30.3622	185	ARGFX	1284.98	332	ZNF511	-1563.95			10901	STAT1	GBP2	25.4554	72531	ENO1	BNIP3	-28.9127	158	RAN	1235.3	158	RAN	-944.226
213039	FOXP3	ANXA1	22.4984	129404	NME1	SDHD	-27.9478	203	ZNF3	808.824	132	HMG20B	-1962.36		535894	RUNX2	PIK3IP1	30.126	228025	BAD	CTSA	-29.0199	70	POU5F1	1233.71	401	GTF2A2	-1460.9			126271	ZBED1	PEX11B	24.6695	89658	ZNF652	NQO2	-24.5213	137	NME1	1043.52	122	MITF	-785.99
535032	MYC	SATB1	21.6652	2413	NCALD	ALDOC	-27.1155	14	ZSCAN32	800.46	365	IL21	-1941.65		618446	JUNB	ZNF331	28.5182	499143	ATF3	DEDD2	-26.5532	30	CRX	1219.07	348	BAD	-1232.14			28717	ZNF22	TAPBPL	21.9399	295969	PIR	MLANA	-24.3827	95	ILF2	809.466	57	ENO1	-763.135
448059	GTF2B	SUSD3	21.428	486304	NME1	NDUFS7	-27.0274	192	ZNF671	780.895	23	ZSCAN16	-1859.04		99310	JUN	DNAJB1	24.8435	25834	TBX21	ADAM8	-25.5047	212	ZNF483	1154.74	71	USF1	-1197.65			24107	NME1	RAD51C	21.2955	347386	ZNF32	ZNF574	-24.2343	57	ENO1	805.932	151	PIR	-684.362
638904	ZNF33A	ZNF253	21.4207	33246	IRF5	PIH1D1	-26.9658	209	ZNF708	772.003	339	NME1	-1757.93		520993	ATF3	XCL2	24.7135	411712	ELF4	C12orf75	-25.2989	188	ZFP14	1141.1	270	ZNF121	-1190.08			178875	HMG20B	CCND1	20.9616	344047	ARNT	TSTD1	-23.306	139	NONO	798.768	139	NONO	-643.602
588706	STAT1	STAT2	21.0832	15366	ZNF274	EXOC4	-26.7584	152	ZNF211	747.845	367	ZBED2	-1673.62		489154	NR4A2	PTGER4	24.5833	500575	ZNF3	POLR3GL	-25.0583	74	SHOX	1138.94	314	ACAA1	-1169.05			284908	HMGA1	CTCFL	20.4682	6866	IRF1	CXCL10	-22.4971	5	APEX1	689.995	177	SNAI2	-571.438
375996	RELA	ATP5H	20.8752	82535	IL21	IDH3G	-26.3235	190	ZNF506	742.211	69	RFXANK	-1649.65		396885	ATF3	ANKRD36BP1	23.3268	101556	ASH2L	RPA2	-24.7124	422	ZNF234	1086.1	414	ZNF689	-1164.66			119895	DLX5	KRT8	20.3495	124464	IRF7	NR1H2	-21.666	145	PARP1	671.939	102	IRF7	-553.535
462574	ZBTB16	TSC22D3	20.6224	542966	IRF8	E2F4	-26.1133	219	ZNF33A	736.205	338	NCALD	-1636.42		549871	CREBZF	HSF1	23.1194	439080	ZNF511	MT2A	-24.6938	310	GATAD1	1081.12	202	ZNF184	-1159.3			253244	ARNT2	FABP7	20.2837	337111	METTL3	RAB38	-21.5732	62	EZH2	604.242	137	NME1	-527.092
73368	ENO1	CALM2	20.4333	257217	HDAC8	OXA1L	-26.0702	145	HSF2	730.867	170	VPS72	-1297.17		589330	STAT1	SP110	23.1158	478392	ACAA1	ATP5D	-23.4727	269	ZNF490	1079.27	45	IRF3	-1144.47			199532	RAN	RPA2	19.7526	1843	PIR	ARPC1B	-19.5577	45	DLX5	560.67	273	ZNF706	-501.383
404861	STAT1	PVRIG	20.3707	342299	NME1	ZNHIT1	-25.7999	292	ZBTB25	719.064	290	ILF2	-1235.37		524475	EOMES	SASH3	22.8454	685858	ZNF337	TRMT1	-23.3055	111	JUN	1068.34	350	ENO1	-1107.11			4697	STAT1	CD74	19.5504	89867	TAF9	NT5C3	-19.5562	38	CTCFL	556.685	185	STAT1	-496.461
637719	ZBTB8A	ZNF471	20.3183	163011	HCLS1	DDIT4	-25.731	408	CTBP1	716.229	150	BATF	-1225.54		392972	FOS	TBCC	21.9642	595269	EOMES	HSF2	-23.0302	319	TFDP2	1058.1	286	ZNF581	-1083.67			182542	HMGA1	DRAP1	19.5063	101577	ENO1	USE1	-19.5165	96	ILF3	547.42	164	RNF114	-468.173
598417	ZFP62	MBD1	20.0317	39270	THAP11	CDC26	-25.4474	167	PINX1	714.859	185	CERS2	-1184.82		485598	JUNB	YPEL5	21.3373	438814	RFXANK	MT2A	-22.7185	259	ZSCAN22	1048.28	108	ZZZ3	-1062.88			251068	HMGA1	DDAH2	19.3311	98582	RNF114	TDRD3	-19.3951	234	ZNF207	525.446	13	ATF4	-467.358
443732	MYC	BCL2A1	19.6624	544430	IL21	IRF8	-25.0515	81	TGIF2	709.998	65	ETV7	-1177.51		559098	ZBTB32	ELF4	20.9343	222168	ASH2L	PSMC5	-22.6924	159	ZNF665	1048.03	426	ZNF397	-1030.43			93736	MAFF	RAMP1	19.2455	253944	NUCB1	FSTL1	-19.3491	163	RFXANK	482.184	144	NUCB1	-444.528
481461	ELK3	GGNBP2	19.3991	55241	IRF5	PDHB	-24.9333	97	MYC	709.862	330	GTF3C5	-1144.95		668284	JUN	CHD2	20.4901	334577	ZNF134	SUCLG1	-22.6286	386	DMC1	1034.51	162	YBX1	-1021.38			62312	ZNF7	SNRNP35	19.1512	325754	DIDO1	HIST1H2BK	-19.3159	81	HDAC2	463.51	157	RAD21	-438.157
170630	ETV7	IL7R	19.3683	267306	IRF5	RHOG	-24.7574	242	ZFP64	704.614	320	EZH2	-1138.02		72817	DDIT3	TUBA1A	20.4404	428974	ZBTB17	PWP1	-22.3782	222	ZNF529	1014.06	118	ATF6	-1014.53			34677	ZNF706	ZNF7	18.9738	115207	PIR	GALE	-19.2985	191	TAF9	462.183	269	ZNF689	-430.506
209734	EZH1	APRT	19.3423	618690	NMRAL1	NUCB1	-24.7103	65	ETV7	703.409	390	ZSCAN25	-1059.78		481685	JUN	GLTSCR2	20.4076	430157	HSF2	TMEM243	-21.611	421	ZNF43	1014.05	143	SP3	-1001.26			274112	ARNT2	TPD52L1	18.8305	189543	CTNNB1	KIT	-19.2062	46	DNMT1	458.702	140	NR1H2	-422.153
214652	MYC	NOSIP	19.0032	509155	IL21	BCL6	-24.5021	271	CDC5L	701.885	54	BCL6	-1046.28		661850	ZNF766	PHF20	18.9897	220809	CREM	NDUFB11	-21.5572	364	PDLIM5	1003.77	278	ZNF335	-994.454			35669	NME1	AKR1B1	18.8202	345043	RAD21	UQCRFS1	-19.0287	94	ID2	410.457	100	IRF3	-418.269
329216	CREM	HSPE1	18.8887	72548	NCALD	RPS4Y1	-24.4828	198	ZNF317	699.063	274	GTF2B	-1045.19		489491	TBX21	BIN1	18.9336	415954	RAN	SNRPC	-21.4968	158	ZNF160	980.263	147	E2F4	-986.749			7187	NME1	DANCR	18.7188	321637	RAD21	ECI2	-19.0105	88	HMGA1	407.337	225	ZEB2	-411.436
605387	CHD1	BCLAF1	18.7999	369422	HMGA1	DSTN	-24.4261	35	ZNF384	698.91	355	TRMT1	-1025.58		437584	E2F4	SFT2D2	18.9331	102967	ZNF134	CPSF3L	-21.2781	394	ZSCAN2	975.402	430	APEX1	-981.509			260656	HMGA1	MDK	18.5931	38534	SP100	C3orf14	-18.8441	80	HDAC1	405.883	198	TFAP2C	-384.113
214620	ETV7	NOSIP	18.6915	123992	GTF3C2	CCT4	-23.9146	398	ZNF43	694.042	146	IRF8	-1015.31		192806	ATF3	JUN	18.8625	265711	YY1	NSA2	-21.2466	274	ZNF350	974.685	199	ZNF671	-974.244			142596	STAT2	BPGM	18.472	303590	RAN	RPL13AP5	-18.8003	59	ETV5	404.875	75	GTF3A	-381.929
	Tfh																														Proliferate Melanoma
	TF	Target	TR_Weight		TF	Target	TR_Weight		TF	TR_Weight		TF	TR_Weight																			TF	Target	TR_Weight		TF	Target	TR_Weight		TF	TR_Weight		TF	TR_Weight
352064	FOXP3	IL2RA	30.7846	298141	ZBTB32	HTATIP2	-28.6626	23	ZSCAN16	1350.51	100	BHLHE40	-1314.61
555320	TCF7	ZBTB20	29.6534	228350	BHLHE40	S100A11	-28.4561	339	NME1	905.248	107	FOSL2	-1216.96																		72531	ENO1	BNIP3	30.3932	43767	ENO1	ENO2	-26.2603	57	ENO1	834.412	158	RAN	-1098.97
641458	MBD1	ZFP62	27.7857	296454	FOXP3	CCR8	-28.2775	132	HMG20B	867.367	171	ZBTB32	-1195.51																		241577	STAT1	WARS	29.1783	206381	ZNF280D	UCN2	-25.8403	151	PIR	732.23	57	ENO1	-928.035
129404	NME1	SDHD	27.2699	196946	STAT1	GBP1	-28.0265	6	RELA	826.023	65	ETV7	-1152.41																		185844	ARID5B	GPX3	27.2409	31160	NR1H2	TTC9C	-24.7087	158	RAN	693.653	139	NONO	-856.898
560615	IL21	HIF1A	26.9489	46	IRF5	PDCL3	-26.9774	50	TCF7	804.284	328	ENO1	-1012.75																		295969	PIR	MLANA	26.4978	4697	STAT1	CD74	-24.4652	122	MITF	633.472	95	ILF2	-855.093
222490	TCF7	CCDC109B	25.6056	244938	JUNB	CXCR4	-25.8004	114	ATF2	785.555	367	ZBED2	-1006.17																		222119	STAT1	HLA-DPA1	25.9606	172211	TAF9	YAE1D1	-24.4184	139	NONO	632.213	137	NME1	-831.861
507195	ETV7	TCF7	25.3821	163011	HCLS1	DDIT4	-25.2734	279	ZBTB8A	785.221	119	CREB3	-860.718																		89658	ZNF652	NQO2	25.0052	66455	STAT1	UBE2L6	-23.6391	177	SNAI2	586.673	145	PARP1	-704.668
542966	IRF8	E2F4	25.2829	337917	FOSL2	TRADD	-25.2371	295	DRAP1	778.347	80	TGIF1	-851.491																		306297	DLX5	SSR2	24.9581	191836	GTF3C2	MIF4GD	-23.5007	146	PAX3	509.046	5	APEX1	-681.13
39270	THAP11	CDC26	25.2288	268612	FOSL2	CRIP1	-24.5557	141	ZKSCAN3	745.163	21	PRDM1	-811.239																		161850	ZNF652	PLEKHJ1	23.8548	272892	TFAP2C	TF	-23.3978	137	NME1	505.707	96	ILF3	-612.99
430914	FOXP3	CD40LG	25.0139	263990	TCF7	LGALS3	-23.9067	69	RFXANK	740.087	164	NR4A3	-810.62																		173408	ZNF574	ZNF326	23.6654	126271	ZBED1	PEX11B	-23.2681	75	GTF3A	492.294	45	DLX5	-563.987
169246	NUCB1	GDI2	23.8928	537117	FOSL2	RUNX3	-23.5771	278	ZBED5	735.952	26	ARNT	-803.718																		344047	ARNT	TSTD1	21.9098	342892	ZNF622	TMEM126A	-23.2018	273	ZNF706	477.505	234	ZNF207	-553.069
618690	NMRAL1	NUCB1	23.8331	453268	JUNB	IMP3	-23.1875	146	IRF8	717.051	332	HDAC8	-790.179																		6866	IRF1	CXCL10	21.8749	120159	CENPBD1	LINC00339	-23.0654	13	ATF4	466.348	38	CTCFL	-533.648
375996	RELA	ATP5H	22.9236	530918	ZNF692	USF2	-23.166	330	GTF3C5	711.042	334	HTATIP2	-788.284																		101577	ENO1	USE1	21.8159	282551	ZNF689	CAPG	-21.9035	129	MYC	466.062	164	RNF114	-490.216
386629	ZBTB16	TNFSF8	22.6892	118778	JUNB	BTG2	-22.944	104	ZZZ3	705.719	261	NFYC	-760.4																		334828	ID2	PHGDH	20.9313	3759	HTATIP2	C3orf37	-21.0648	102	IRF7	418.577	88	HMGA1	-487.998
386415	TCF7	TNFSF8	22.677	424883	NCALD	CD320	-22.8623	264	ZBTB16	683.372	144	FOXP3	-742.167																		115207	PIR	GALE	20.8577	284908	HMGA1	CTCFL	-20.8861	269	ZNF689	413.545	163	RFXANK	-485.189
606585	GTF2I	HCFC1	22.5546	456335	ZNF22	SIVA1	-22.6286	111	SREBF2	683.234	352	TBPL1	-733.084																		124464	IRF7	NR1H2	20.6336	205804	ZGPAT	TUBB2A	-20.8136	5	APEX1	410.389	70	GTF2A2	-480.479
306659	IKZF4	COA3	22.3416	387710	BHLHE40	ID2	-22.4864	193	ZNF264	680.339	180	ZEB1	-717.841																		50078	RNF114	KLHDC8B	20.4465	274112	ARNT2	TPD52L1	-20.7323	185	STAT1	398.8	81	HDAC2	-478.699
413232	HCFC1	EIF3F	22.2048	183945	BHLHE40	DDX39A	-22.3788	341	NUCB1	677.97	203	ZNF3	-688.19																		7389	ENO1	DDX41	20.3343	251068	HMGA1	DDAH2	-20.2321	164	RNF114	391.219	13	ATF4	-467.544
51898	ZSCAN16	DGCR6L	22.137	524166	PRDM1	RORA	-22.2239	71	TP53	667.291	335	ID2	-684.135																		223247	STAT1	IFI30	19.9403	90861	ENO1	PDCD6	-19.6585	8	ARNT2	380.921	203	TP53	-433.803
627671	ZNF324	PHF1	22.0251	533834	FOXP3	CREB3L2	-22.1718	275	TOPORS	661.765	37	PBX4	-680.846																		41041	PIR	CRYL1	19.796	107312	PML	BCYRN1	-19.5161	180	SOX10	379.517	179	SND1	-430.994
																															253244	ARNT2	FABP7	19.6291	178875	HMG20B	CCND1	-19.4569	264	ZNF652	372.417	191	TAF9	-413.199
	CD4 Effector Memory																														Invasive Melanoma
	TF	Target	TR_Weight		TF	Target	TR_Weight		TF	TR_Weight		TF	TR_Weight																			TF	Target	TR_Weight		TF	Target	TR_Weight		TF	TR_Weight		TF	TR_Weight
352064	FOXP3	IL2RA	30.3154	555320	TCF7	ZBTB20	-30.7115	171	ZBTB32	1391.76	46	IRF5	-2692.58
303430	ETV7	HLA-DRB1	29.4399	509368	NR4A1	EGR2	-30.3715	65	ETV7	1098.86	23	ZSCAN16	-2544.88																		206381	ZNF280D	UCN2	26.9663	72531	ENO1	BNIP3	-28.9392	158	RAN	660.032	151	PIR	-908.004
298141	ZBTB32	HTATIP2	28.6612	41565	ETV7	OASL	-29.8184	215	ZNF383	869.05	65	ETV7	-2340.16																		275841	DLX5	VCY1B	23.4676	241577	STAT1	WARS	-28.5858	137	NME1	539.541	57	ENO1	-807.289
196946	STAT1	GBP1	27.9869	18210	IL21	LOC100128420	-29.2627	204	ZNF562	817.359	339	NME1	-2149.1																		66455	STAT1	UBE2L6	23.3807	295969	PIR	MLANA	-26.6487	96	ILF3	523.76	122	MITF	-798.493
296454	FOXP3	CCR8	27.9672	641458	MBD1	ZFP62	-27.6109	88	JUNB	783.708	365	IL21	-2120.61																		284908	HMGA1	CTCFL	22.707	185844	ARID5B	GPX3	-26.6315	139	NONO	511.719	158	RAN	-578.507
554603	NR4A1	KLF10	26.978	486304	NME1	NDUFS7	-27.2424	166	PPARD	780.919	338	NCALD	-1971.61																		24107	NME1	RAD51C	21.7238	166014	TFAP2C	SFRP1	-25.7032	38	CTCFL	508.714	75	GTF3A	-577.388
635924	FOXP3	IKZF4	26.5664	2413	NCALD	ALDOC	-27.0763	17	ZSCAN26	773.445	132	HMG20B	-1961.47																		175209	HMG20B	AGPAT2	21.46	278208	RAB18	ZNF672	-24.7111	57	ENO1	506.307	177	SNAI2	-569.683
309655	ETV7	HLA-DRB5	25.9643	33246	IRF5	PIH1D1	-26.7824	19	ZNF32	755.469	150	BATF	-1954.02																		107312	PML	BCYRN1	21.1587	222119	STAT1	HLA-DPA1	-24.1747	88	HMGA1	481.167	146	PAX3	-560.579
6564	NME1	GSTP1	23.9754	342299	NME1	ZNHIT1	-26.498	190	ZNF506	741.785	367	ZBED2	-1910.5																		282551	ZNF689	CAPG	20.9996	272892	TFAP2C	TF	-23.5885	95	ILF2	461.211	39	CTNNB1	-536.197
553754	FOXP3	ZBTB32	23.3319	378241	ZNF140	NUDT22	-25.9881	173	KLF10	714.952	185	CERS2	-1578.46																		280040	ATF6	ARMCX6	20.9291	173408	ZNF574	ZNF326	-22.9897	45	DLX5	456.206	273	ZNF706	-528.96
359455	ETV7	CCR5	23.2232	257217	HDAC8	OXA1L	-25.6719	403	ZNF397	708.4	69	RFXANK	-1550.47																		191745	ZNF669	METTL23	20.2005	63353	STAT1	TAP1	-22.8631	234	ZNF207	433.054	59	ETV5	-526.211
245879	ZNF331	MIR4461	23.057	39270	THAP11	CDC26	-25.6718	144	FOXP3	702.352	301	DPF2	-1306.33																		260656	HMGA1	MDK	20.0301	6866	IRF1	CXCL10	-22.8075	145	PARP1	419.905	164	RNF114	-518.003
277700	ETV7	SAT1	22.9493	15366	ZNF274	EXOC4	-25.6582	201	ZNF189	694.773	50	TCF7	-1254.82																		205804	ZGPAT	TUBB2A	19.9625	127986	ZNF281	PSEN2	-22.3333	5	APEX1	415.785	185	STAT1	-509.154
155275	ETV7	GBP2	22.2542	386629	ZBTB16	TNFSF8	-25.548	400	ZNF493	686.023	330	GTF3C5	-1137.9																		182542	HMGA1	DRAP1	19.8245	336610	SREBF2	PSMB8	-21.8486	62	EZH2	411.682	13	ATF4	-508.11
405626	ZBTB32	SYNGR2	22.1613	560615	IL21	HIF1A	-25.4813	375	ZNF672	677.686	352	TBPL1	-1083.39																		332376	SOX10	NFYA	19.5498	16644	ARID5B	MBNL2	-21.592	42	CXXC5	371.078	139	NONO	-501.945
436230	ETV7	RHOC	22.1146	618690	NMRAL1	NUCB1	-25.4378	263	ZBTB11	676.762	6	RELA	-1067.9																		93736	MAFF	RAMP1	19.4134	66012	CBFB	TUBB6	-21.5688	163	RFXANK	365.183	198	TFAP2C	-496.61
2955	TCF7	SELL	21.8772	154860	ETV7	TRIM27	-25.3109	240	ZNF574	673.227	119	CREB3	-1058.86																		344479	RAD21	TUBB4B	19.2432	115207	PIR	GALE	-20.97	94	ID2	364.842	102	IRF7	-472.517
306659	IKZF4	COA3	21.843	222490	TCF7	CCDC109B	-25.2267	126	TERF2	652.297	293	ACAA1	-1018.99																		251068	HMGA1	DDAH2	18.9054	253244	ARNT2	FABP7	-20.8443	194	TBPL1	359.285	140	NR1H2	-466.706
448059	GTF2B	SUSD3	21.406	267306	IRF5	RHOG	-24.8651	289	GATAD1	651.641	320	EZH2	-982.305																		12642	ZNF207	HERPUD1	18.8524	337111	METTL3	RAB38	-20.7178	81	HDAC2	351.438	8	ARNT2	-453.684
594384	ZZZ3	CEBPZ	21.1626	299727	MYC	SNHG8	-24.8266	213	ZNF626	635.865	56	BACH1	-981.475																		59448	ZKSCAN3	RGS2	18.1548	101577	ENO1	USE1	-20.5278	176	SMC3	347.823	180	SOX10	-429.236
																															48244	BCLAF1	HSPA1A	17.6218	124464	IRF7	NR1H2	-20.4768	125	MSC	347.084	182	SP100	-415.335
